# Supplementary material
Source: PubMed Central journal article supplement (PMC5528553)
Supplement: MOL2-8-250-s004.pdf [file MOL2-8-250-s004.pdf]

# Supplemental Figure 1

DT tumor

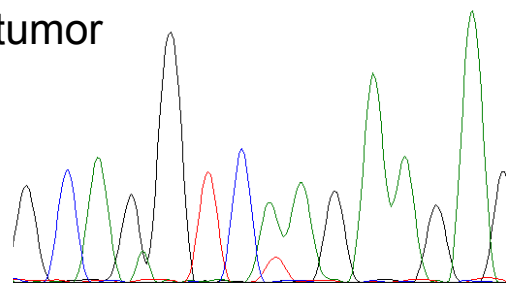

CAA>CTA

HRASP.GLN61LEU

DTP tumor

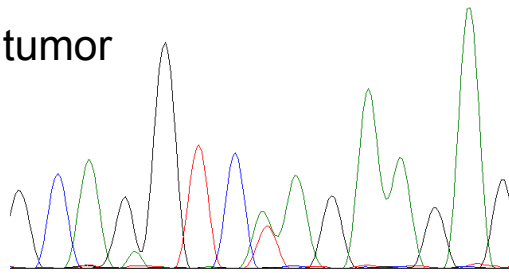

CAA>CTA

HRASP.GLN61LEU

PDV

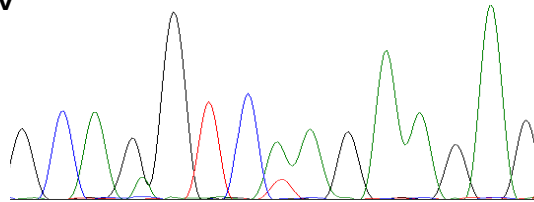

CAA>CTA

HRASP.GLN61LEU
