# Supplementary material
Source: PubMed Central journal article supplement (PMC5528553)

# Supplemental Figure 2

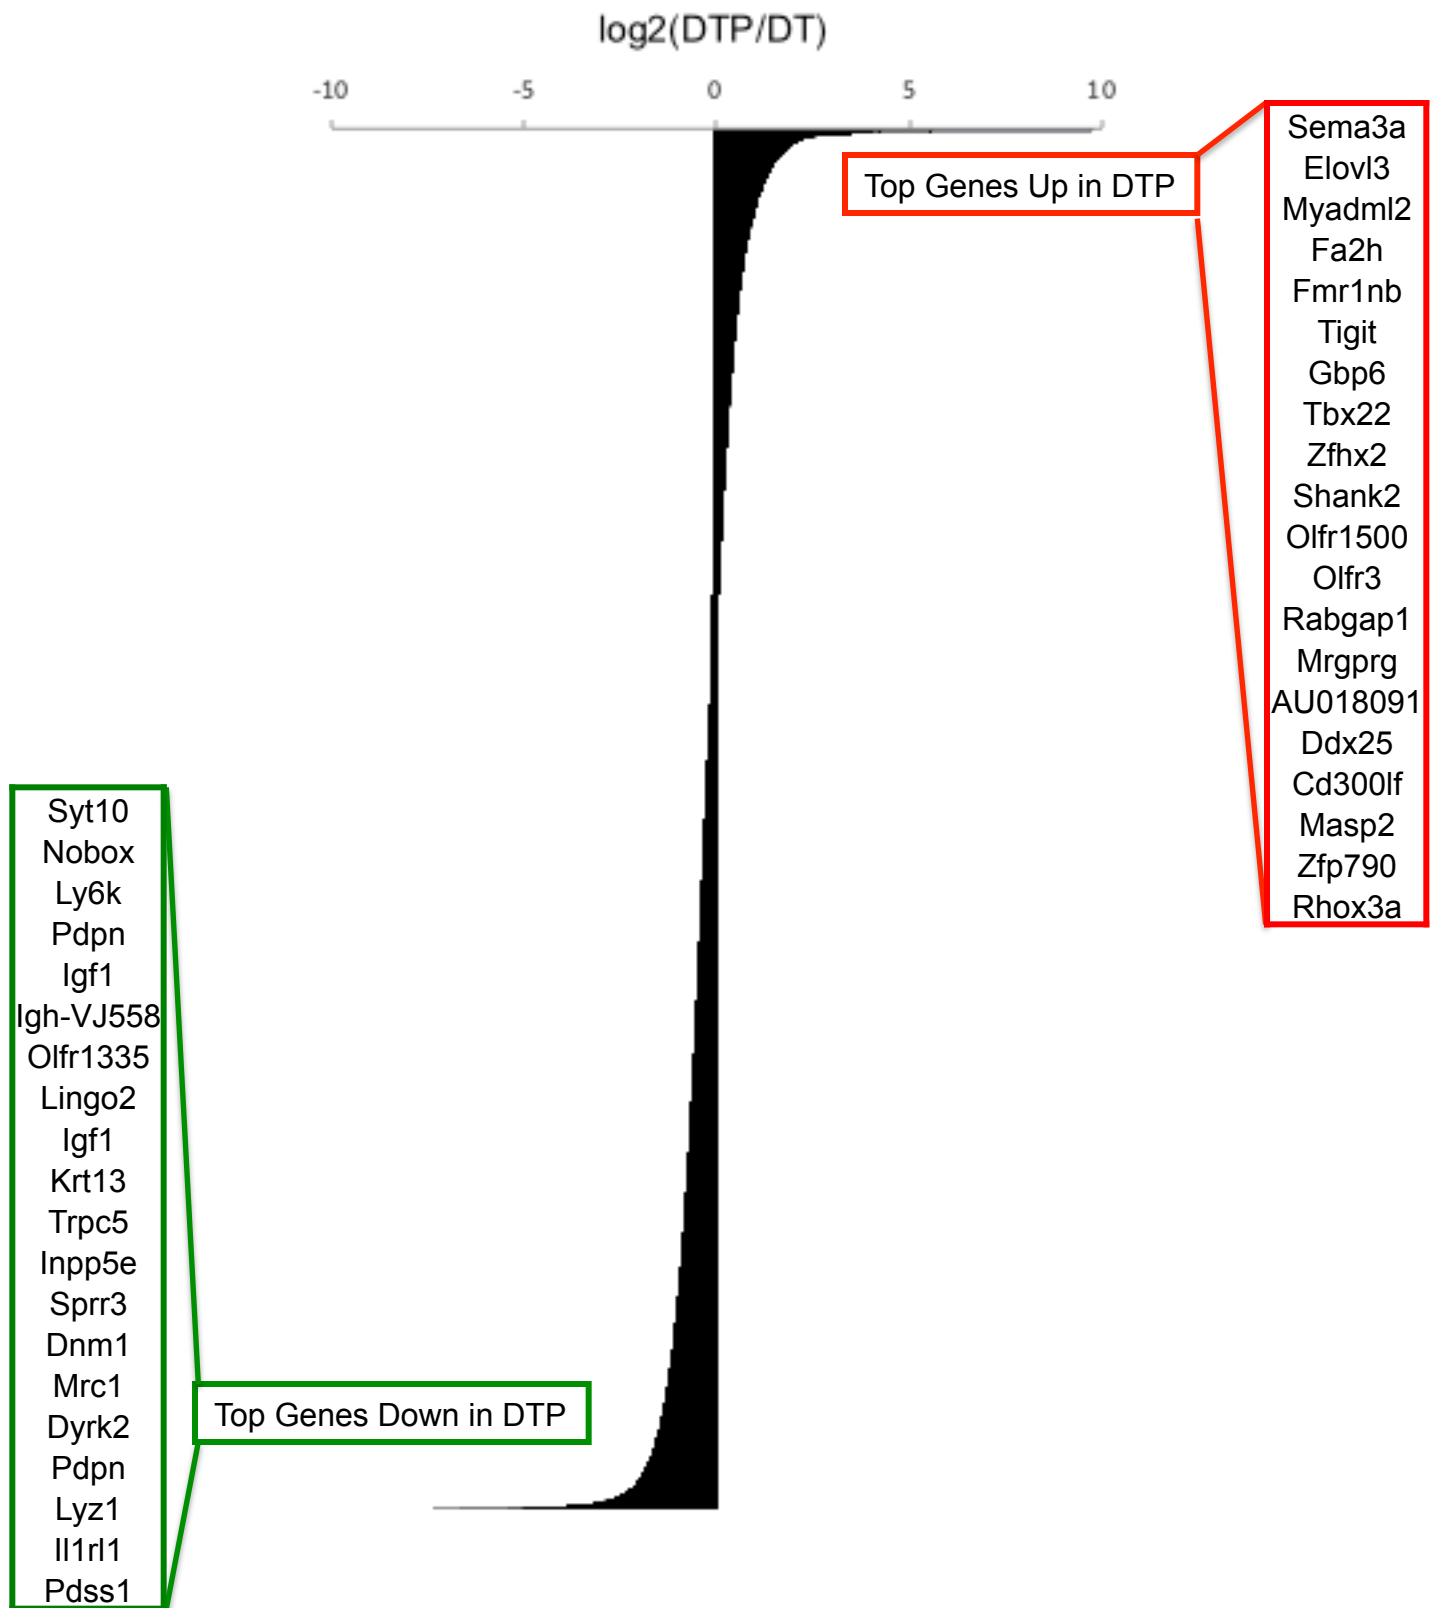

Supplement: MOL2-8-250-s002.pdf [file MOL2-8-250-s002.pdf]
